# Supplementary material
Source: Springer Nature journal article supplement (https://www.springermedizin.de/resource/supplementary/13054_2005_3717_MOESM7_ESM.pdf/9721134)

**B**

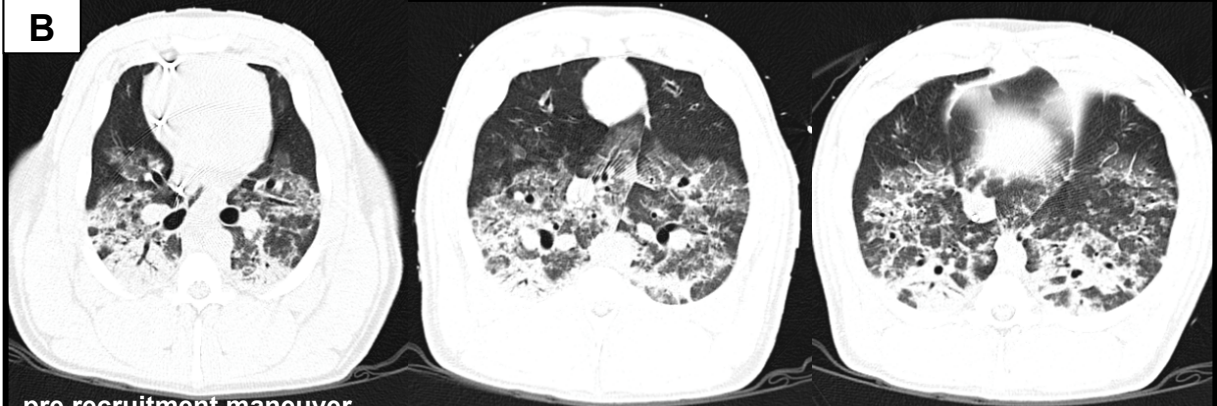

pre recruitment maneuver

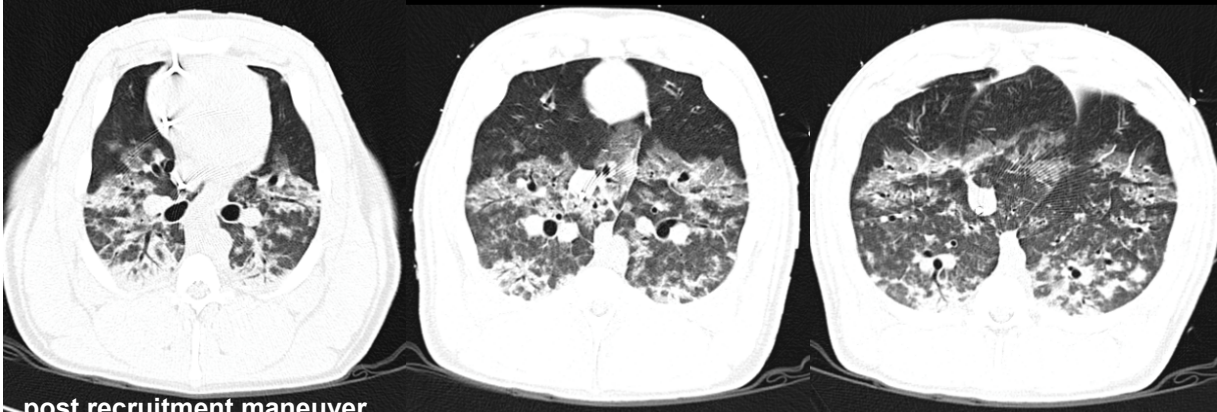

post recruitment maneuver

Supplement: MOESM7 [file 9721134]
